# Supplementary material
Source: PubMed Central journal article supplement (PMC4189974)
Supplement: NIHMS619369-supplement-01.pdf [file NIHMS619369-supplement-01.pdf]

**Supplementary Table 1. Allele frequencies of significant pharmacogenetic SNPs reported in Table 2 in the non-Hispanic whites and African American stroke cases**

| SNP name   | Allele | Average      | non-Hispanic whites |      |      | Average      | African American |      |      |
|------------|--------|--------------|---------------------|------|------|--------------|------------------|------|------|
|            |        | Across Drugs | D1                  | D2   | D3   | Across drugs | D1               | D2   | D3   |
| rs12143842 | C      | 0.73         | 0.69                | 0.78 | 0.74 | 0.86         | 0.88             | 0.78 | 0.89 |
| rs16847548 | T      | 0.77         | 0.74                | 0.81 | 0.78 | 0.80         | 0.81             | 0.74 | 0.83 |
| rs6473383  | G      | 0.86         | 0.86                | 0.88 | 0.83 | 0.70         | 0.69             | 0.72 | 0.68 |
| rs4917434  | C      | 0.89         | 0.89                | 0.92 | 0.86 | 0.96         | 0.95             | 0.96 | 0.96 |
| rs2607927  | C      | 0.52         | 0.52                | 0.42 | 0.56 | 0.74         | 0.79             | 0.73 | 0.70 |
| rs200148   | A      | 0.59         | 0.55                | 0.64 | 0.63 | 0.45         | 0.58             | 0.43 | 0.49 |
| rs898271   | G      | 0.51         | 0.54                | 0.47 | 0.50 | 0.27         | 0.27             | 0.27 | 0.27 |

D1 = chlorthalidone, D2 = amlodipine, D3 = lisinopril

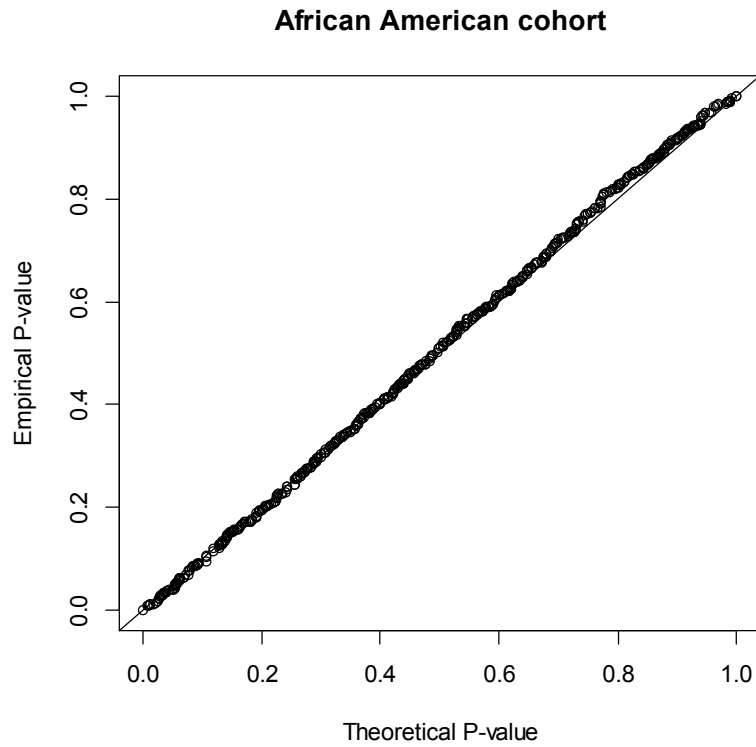

Supplementary Figure 1. Quantile-Quantile plot of the P-values from the single SNP test in the African American cohort obtained from assuming a Chi-square distribution (“theoretical P-values”) or from permutations (“empirical P-values”).
